# Supplementary material for: Early Cretaceous <em>Keteleerioxylon</em> Wood in Songliao Basin, Northeast China, and Its Geographic and Environmental Implications
Source: Preprints.org preprint supplement (doi:10.20944/preprints202209.0391.v1), 2022-09-26
Supplement: Supplementary file 1 [file Supplementary data Cell diameter .xlsx]

## Sheet: Growth Ring A
Cell diameter (μm)	File 1	File 2	File 3	File 4	File 5	Average	CSDM
1	28.75	66.82	50.69	28.55	64.28	47.818	8.818
2	69.15	71.21	51.15	70.29	44.06	61.172	30.99
3	81.6	62.94	62.66	61.32	54.39	64.582	56.572
4	83.52	76.98	66.34	63.71	49.86	68.082	85.654
5	85.91	60.07	65.51	58.98	67.32	67.558	114.212
6	61.17	60.07	65.41	55.87	60.7	60.644	135.856
7	64.61	48.43	63.71	46.99	53.79	55.506	152.362
8	52.99	54.69	49.28	46.38	40.78	48.824	162.186
9	43.85	79.33	60.7	73.99	49.71	61.516	184.702
10	68.2	54.83	64.92	59.47	68.2	63.124	208.826
11	27.2	70.06	60.82	59.64	54.39	54.422	224.248
12	43.85	43.32	36.89	32.52	43.85	40.086	225.334
13	20.98	44.71	33.17	48.06	42.17	37.818	224.152
14	29.49	36.29	42.86	45.94	39.67	38.85	224.002
15	26.86	29.06	47.64	44.71	35.48	36.75	221.752
16	16.23	22.87	42.86	32.79	36.89	30.328	213.08
17	12.01	19.37	22.79	23.49	21.66	19.864	193.944
18	0	17.21	0	17.09	11.55	9.17	164.114
19	0	18.71	0	13.44	16.23	9.676	134.79
20	0	13.83	0	12.75	18.71	9.058	104.848
21	0	14.47	0	21.66	10.23	9.272	75.12
22	0	10.23	0	0	0	2.046	38.166
23	0	11.08	0	0	0	2.216	1.382

## Sheet: Growth Ring B
Cell diameter (μm)	File 1	File 2	File 3	File 4	File 5	Average	CSDM
1	87.85	72.34	76.66	62.4	65.28	72.906	31.906
2	71.95	67.36	79.42	69.93	77.75	73.282	64.188
3	79.03	72.18	85.41	55.82	77.75	74.038	97.226
4	97.52	70.69	79.84	74.01	80.7	80.552	136.778
5	78.35	50.77	74.88	67.36	73.29	68.93	164.708
6	65.7	71.04	64	75.68	75.31	70.346	194.054
7	67.92	64.55	56.98	67.92	54.48	62.37	215.424
8	67.36	51.68	63.22	67.41	64.55	62.844	237.268
9	72.5	73.63	71.61	59.19	70.29	69.444	265.712
10	74.98	66.95	53.22	73.29	78.07	69.302	294.014
11	73.29	66.24	64.25	66.95	66.95	67.536	320.55
12	74.42	53.83	43.7	75.68	66.24	62.774	342.324
13	46.79	53.26	42.86	57.5	69.93	54.068	355.392
14	62.56	58.91	40.02	50.45	60.39	54.466	368.858
15	52.14	63.61	43.37	50.77	67.21	55.42	383.278
16	65.7	54.21	48.49	72.73	65.95	61.416	403.694
17	65.7	36.05	44.71	67.41	76.13	58	420.694
18	37.87	34.29	37.75	48.75	48.27	41.386	421.08
19	53.39	43.41	41.28	47.07	79.33	52.896	432.976
20	37.87	46.79	32.97	54.88	55.28	45.558	437.534
21	38.67	55.52	29.59	49.83	32.57	41.236	437.77
22	40.02	41.46	27.65	36	48.27	38.68	435.45
23	29.35	34.67	42.89	48.03	39.58	38.904	433.354
24	30.38	29.14	34.33	20.71	28.27	28.566	420.92
25	31.28	16.26	29.94	17.49	34.96	25.986	405.906
26	25.71	14.14	28.73	22.35	32.97	24.78	389.686
27	17.14	29.14	27.91	22.55	27.49	24.846	373.532
28	22.55	27.49	27.49	24.24	31.05	26.564	359.096
29	32.57	30.86	34.33	29.14	30.86	31.552	349.648
30	13.71	25.71	30.86	30.86	18.94	24.016	332.664
31	12	10.29	24.06	13.82	24.06	16.846	308.51
32	20.86	20.57	29.14	27.49	24	24.412	291.922
33	17.22	22.35	17.22	22.35	12.13	18.254	269.176
34	15.43	25.94	15.43	20.86	17.22	18.976	247.152
35	15.52	24.24	10.29	15.43	13.82	15.86	222.012
36	10.42	18.86	13.82	15.43	9.23	13.552	194.564
37	14.65	12	10.85	13.71	12	12.642	166.206
38	10.85	10.42	8.74	17.14	10.42	11.514	136.72
39	10.42	10.42	8.74	0	0	5.916	101.636
40	8.74	12.13	10.85	0	0	6.344	66.98
41	9.23	8.74	0	0	0	3.594	29.574
42	10	0	0	0	0	2	-9.426

## Sheet: Growth Ring C
Cell diameter (μm)	File 1	File 2	File 3	File 4	File 5	Average	CSDM
1	59.11	67.11	66.63	58.66	64.92	63.286	23.286
2	51.1	68.97	64.36	53.69	59.81	59.586	42.872
3	40.02	64.06	60.6	57.29	57.42	55.878	58.75
4	43.2	50.25	50.25	31.78	54.57	46.01	64.76
5	55.63	75.03	58.25	52.18	55.01	59.22	83.98
6	70.08	68.01	72.48	52.66	56.23	63.892	107.872
7	83.45	68.01	73.53	49.17	57.57	66.346	134.218
8	60.16	68.57	71.2	44.21	58.23	60.474	154.692
9	54.49	55.21	72.02	39.71	58.27	55.94	170.632
10	72.98	52.63	67.52	44.64	58.22	59.198	189.83
11	41.3	53.69	63.21	45.2	57.75	52.23	202.06
12	52.18	39.71	42.7	35.86	56.75	45.44	207.5
13	21.86	28.3	38.84	21.36	54.78	33.028	200.528
14	21.36	28.94	30.84	18.38	52.75	30.454	190.982
15	14.47	29.78	22.86	20.94	50.8	27.77	178.752
16	28.94	20.94	38.77	20.94	49.34	31.786	170.538
17	17.55	36.24	25.36	21.36	47.74	29.65	160.188
18	16.01	18.97	22.86	14.9	46.08	23.764	143.952
19	9.55	22.86	18.97	16.39	44.47	22.448	126.4
20	4.97	16.39	14.9	0	42.68	15.788	102.188
21	0	0	0	0	40.77	8.154	70.342
22	0	0	0	0	38.92	7.784	38.126
23	0	0	0	0	37.23	7.446	5.572

## Sheet: Growth Ring D
Cell diameter (μm)	File 1	File 2	File 3	File 4	File 5	Average	CSDM
1	66.63	66.63	53.67	66.63	90.43	68.798	23.798
2	64.51	49.21	58.18	58.96	96.14	65.4	44.198
3	53.67	49.07	60.29	75.36	85.69	64.816	64.014
4	64.83	57.91	66.11	72.97	85.37	69.438	88.452
5	81.11	66.22	68.74	79.33	74.88	74.056	117.508
6	72.5	55.42	66.11	70.63	94.17	71.766	144.274
7	78.9	66.63	55.46	60.02	70.86	66.374	165.648
8	48.09	94.39	51.86	55.59	88.66	67.718	188.366
9	51.86	55.79	48.61	51.86	63.99	54.422	197.788
10	55.79	70.86	72.5	55.59	62.15	63.378	216.166
11	60.02	68.51	66.39	53.67	66.63	63.044	234.21
12	43.11	46.89	53.67	64.09	55.42	52.636	241.846
13	49.07	51.2	66.08	57.91	66.63	58.178	255.024
14	72.75	75.1	44.77	49.21	66.94	61.754	271.778
15	83.15	62.4	66.08	64.09	44.81	64.106	290.884
16	74.64	53.34	72.47	68.74	49.76	63.79	309.674
17	59.68	53.46	63.99	62.73	36.42	55.256	319.93
18	48.09	55.46	36.8	57.59	38.37	47.262	322.192
19	42.85	36.3	46.89	59.38	23.54	41.792	318.984
20	64.26	31.04	32.05	47.09	15.52	37.992	311.976
21	28.99	23.06	36.24	20.22	30.51	27.804	294.78
22	23.83	25.93	26.37	33.1	20.22	25.89	275.67
23	26.71	23.83	28.99	14.3	26.37	24.04	254.71
	12.97	28.43	22.25	18.22	11.47	18.668	228.378
	16.23	18.22	22.25	26.37	13.49	19.312	202.69
	17.58	17.19	16.23	0	17.58	13.716	171.406
	17.58	10.86	11.47	0	15.07	10.996	137.402
	18.22	0	0	0	16.23	6.89	99.292
	0	0	0	0	12.43	2.486	56.778
	0	0	0	0	8.79	1.758	13.536

## Sheet: Growth Ring E
Cell diameter (μm)	File 1	File 2	File 3	File 4	File 5	Average	CSDM
1	66.63	51.55	67.75	61.52	89.47	67.384	22.384
2	58.96	60.02	69.39	76.08	77.79	68.448	45.832
3	71.5	60.29	66.94	69.04	82.78	70.11	70.942
4	75.1	71.5	67.3	60.63	77.79	70.464	96.406
5	79.9	75.36	76.53	63.13	80.26	75.036	126.442
6	80.26	79.9	64.83	47.33	86.56	71.776	153.218
7	73.26	71.5	61.04	60.29	80.26	69.27	177.488
8	60.29	65.21	71.5	67.75	79.9	68.93	201.418
9	58.96	64.83	59.45	71.91	83.82	67.794	224.212
10	81.26	56.07	60.29	79.59	70.38	69.518	248.73
11	49.76	58.18	70.86	58.18	66.94	60.784	264.514
12	54.34	71.14	79.9	57.99	60.02	64.678	284.192
13	40.56	64.51	79.59	75.36	55.79	63.162	302.354
14	62.15	72.97	79.33	60.63	62.15	67.446	324.8
15	56.07	66.63	53.67	68.74	51.55	59.332	339.132
16	53.67	59.84	47.33	70.86	47.09	55.758	349.89
17	57.71	48.09	53.67	45.22	51.86	51.31	356.2
18	53.97	56.07	56.43	45.22	51.55	52.648	363.848
19	47.33	43.11	41.01	67.3	34.7	46.69	365.538
20	41.87	38.61	40.72	45.57	30.15	39.384	359.922
21	21.74	28.03	34.7	47.09	30.15	32.342	347.264
22	25.93	23.54	26.37	21.74	15.07	22.53	324.794
23	21.74	21.74	23.54	16.23	15.07	19.664	299.458
24	27.79	21.42	30.51	18.22	18.22	23.232	277.69
25	15.07	13.49	19.3	19.66	25.93	18.69	251.38
26	17.05	13.49	18.22	17.19	18.22	16.834	223.214
27	21.74	13.49	15.07	13.49	16.23	16.004	194.218
28	12.97	17.19	15.07	15.07	14.3	14.92	164.138
29	12.79	10.66	17.19	15.07	13.49	13.84	132.978
30	12.97	17.58	15.07	16.23	0	12.37	100.348
31	17.05	12.97	12.97	14.3	0	11.458	66.806
32	23.54	17.19	0	0	0	8.146	29.952
33	0	17.05	0	0	0	3.41	-11.638
